# Supplementary material for: Fauna associated with shallow-water methane seeps in the Laptev Sea
Source: PeerJ. 2020 May 4;8:e9018. doi: 10.7717/peerj.9018 (PMC7204824; doi:10.7717/peerj.9018)
Supplement: Supplemental Information 1 [file peerj-08-9018-s001.xlsx]

## Sheet: Station-species list
Higher Taxon	Group	Species	C15 trawl		ODEN trawl		AMK-63												AMK-69																		AMK-72
			total	percentage	total	percentage	seep-1	seep-1	seep-2	seep-2	seep-3	seep-3	control-1	control-1	control-2	control-2	control-3	control-3	5623-1	5623-1	5623-2	5623-2	5623-3	5623-3	5624-1	5624-1	5624-2	5624-2	5624-3	5624-3	5625-1	5625-1	5625-2	5625-2	5625-3	5625-3	5947-1	5947-1	5947-2	5947-2	5947-3	5947-3	5953-1	5953-1	5953-2	5953-2	5953-3	5953-3
							A	B	A	B	A	B	A	B	A	B	A	B	A	B	A	B	A	B	A	B	A	B	A	B	A	B	A	B	A	B	A	B	A	B	A	B	A	B	A	B	A	B
Porifera	Calcarea	Sycon sp.	9	0.00131004	3	0.000628272
	Demospongia	Lycopodina lycopodium (Levinsen, 1887)	1	0.00014556
		Mycale sp.	1	0.00014556
		Suberites domuncula (Olivi, 1792)	11	0.00160116
		Tentorium semisuberites (Schmidt, 1870)	1	0.00014556
		Craniella polyura (Schmidt, 1870)	89	0.0129549													1	0.006
Cnidaria	Actinaria	Hormathia digitata (O.F. Müller, 1776)			1	0.000209424
		Actinostola sp.																																									1	0.474
		Edwardsiidae gen.sp.																																											2	0.095
	Alcyonaria	Gersemia fruticosa Sars, 1860	2	0.000291121
		Gersemia rubiformis (Ehrenberg, 1834)	1	0.00014556
	Ceriantharia	Cerianthus vogti Danielssen, 1890																			1	0.111
	Scyphozoa	Lucernaria bathyphila Haeckel, 1880	1	0.00014556
	Hydrozoa	Lafoea dumosa (Fleming, 1820)	4	0.000582242	7	0.00146597																																			1	0.003			3	0.014
		Stegopoma plicatile (Sars, 1863)	1	0.00014556
		Plotocnide borealis Wagner, 1885							1	0.0005
		Hydrozoa gen.sp.	1	0.00014556
	inc. sedis	Planulae							6	0.002
Polychaeta	Phyllodocidae	Eteone agg. flava			2	0.000418848			3	0.005									1	0.003			4	0.014													1	0.001					3	0.029	1	0.004
		Paranaitis wahlbergi (Malmgren, 1865)			1	0.000209424
		Phyllodoce groenlandica Örsted, 1842	4	0.000582242	5	0.00104712											1	0.099			1	0.329																							1	0.005	1	0.003
		Phyllodoce maculata (Linnaeus, 1767)	2	0.000291121
	Polynoidae	Bylgides groenlandicus (Malmgren, 1867)	2	0.000291121	5	0.00104712
		Bylgides promamme (Malmgren, 1867)	8	0.00116448
		Eucranta villosa Malmgren, 1865			10	0.00209424													1	0.002																							1	0.004
		Gattyana cirrhosa (Pallas, 1766)	11	0.00160116	19	0.00397906			1	0.001											2	0.174																	1	0.002			1	0.073			1	0.005
		Harmothoe globifera (Sars G.O., 1873)			2	0.000418848
		Harmothoe impar (Johnston, 1839)			1	0.000209424
		Melaenis loveni Malmgren, 1865																											1	0.018
		Macellicephala violacea (Levinsen, 1887)	1	0.00014556
		Polynoidae gen.sp.	1	0.00014556
	Pholoidae	Pholoe longa (O.F. Müller, 1776)	95	0.0138282	125	0.026178	4	0.002	30	0.039	4	0.003	4	0.001	5	0.002	9	0.003	6	0.005			11	0.009	1	0.001					8	0.005			1	0.001	2	0.001	15	0.02	1	0.0005	13	0.008			5	0.002
	Hesionidae	Nereimyra aphroditoides (O. Fabricius, 1780)	5	0.000727802
	Syllidae	Anguillosyllis pupa (Hartman, 1965)	1	0.00014556
		Pionosyllis magnifica Moore, 1906	1	0.00014556
		Erinaceusyllis erinaceus (Claparède, 1863)																																					1	0.0005
	Nephthyidae	Aglaophamus malmgreni (Théel, 1879)	23	0.00334789	4	0.000837696	1	0.251	1	0.413					1	0.008	1	0.034					1	0.009			1	0.065	1	0.781													1	0.191			1	0.021
		Micronephthys minuta Théel, 1879	11	0.00160116	70	0.0146597	22	0.015	122	0.192	13	0.004	8	0.004	13	0.003			6	0.004	1	0.001	10	0.009	1	0.0005					4	0.003	3	0.003					2	0.002			3	0.002	2	0.002	2	0.004
		Nephtys ciliata (Müller, 1788)	2	0.000291121	8	0.00167539					2	0.206							2	1.635	2	0.736	2	0.177							2	0.231	3	0.279					1	0.193			3	1.09	2	0.459	2	1.63
		Nephtys longosetosa Örsted, 1842																																													2	0.294
		Nephtys pente Rainer, 1984							3	0.156
	Nereididae	Nereis zonata Malmgren, 1867	8	0.00116448	19	0.00397906			1	0.001									3	2.81			2	0.076											1	0.125											1	0.074
	Sphaerodoridae	Ephesiella abyssorum (Hansen, 1878)	1	0.00014556	19	0.00397906			3	0.001							1	0.0005	1	0.004					2	0.005					2	0.002	3	0.002	1	0.0005	1	0.003					2	0.007	1	0.001
		Sphaerodorum gracilis (Rathke, 1843)	6	0.000873362
		Sphaerodoropsis minuta (Webster & Benedict, 1887)	1	0.00014556
	Onuphidae	Nothria hyperborea (Hansen, 1878)	7	0.00101892	43	0.00900524			1	0.001
	Lumbrineridae	Scoletoma fragilis (O.F. Müller, 1776)	19	0.00276565	56	0.0117277			9	0.016	11	0.028	9	0.018	9	0.016	11	0.043	14	0.107	8	0.03	12	0.06	6	0.016	16	0.064	8	0.036			12	0.029	3	0.007	4	0.013	15	0.085	9	0.095	28	0.109	18	0.094	27	0.11
	Dorvilleidae	Ophryotrocha sp.	3	0.000436681			23	0.007	361	0.084																																	1	0.0005
	Spionidae	Laonice cirrata (M. Sars, 1851)	2	0.000291121	8	0.00167539							1	0.33	1	0.363			2	0.02	1	0.022	2	0.425	1	0.027			3	0.032															1	0.459	1	0.414
		Prionospio cirrifera Wirén, 1883	5	0.000727802	3	0.000628272	1	0.001							1	0.0005	1	0.0005	4	0.004	1	0.002	2	0.003															1	0.001					1	0.001	2	0.002
		Pygospio elegans Claparède, 1863			6	0.00125654
		Spio limicola Verrill, 1879	1	0.00014556	2	0.000418848
		Dipolydora coeca Örsted, 1843	12	0.00174672	1	0.000209424																															1	0.001
	Apistobranchidae	Apistobranchus tullbergi (Théel, 1879)																									1	0.001
	Chaetopteridae	Spiochaetopterus typicus M Sars, 1856									1	0.001							2	0.324	2	0.568											1	0.257	1	0.436							4	0.298	3	1.045	7	0.845
	Cossuridae	Cossura longocirrata Webster & Benedict, 1887	3	0.000436681	25	0.0052356	353	0.275	45	0.013	2	0.001											1	0.0005															1	0.0005
	Cirratulidae	Cirratulus cirratus (O. F. Müller, 1776)	8	0.00116448	10	0.00209424					8	0.019
		Chaetozone setosa Malmgren, 1867			2	0.000418848					2	0.002							3	0.015			5	0.033																	1	0.001	2	0.005	2	0.006
		Tharyx sp.	3	0.000436681	32	0.00670157			5	0.015	7	0.03	9	0.011	8	0.009	4	0.014	35	0.127	22	0.089	53	0.189	2	0.004	2	0.001	3	0.037	1	0.002	5	0.012	2	0.004	5	0.012	4	0.02	4	0.008	21	0.053	27	0.084	37	0.142
	Flabelligeridae	Brada incrustata Støp-Bowitz, 1948	3	0.000436681	22	0.00460733			1	2.551									1	2.143
		Brada inchabilis (Rathke, 1843)	1	0.00014556
		Brada villosa (Rathke, 1843)	45	0.00655022	3	0.000628272			2	0.025
		Flabelligera affinis M. Sars, 1829			1	0.000209424
		Diplocirrus longisetosus (Marenzeller, 1890)	15	0.00218341	25	0.0052356			4	0.023			1	0.001									1	0.013																			3	0.006	1	0.007
	Scalibregmatidae	Scalibregma inflatum Rathke, 1843	2	0.000291121			1	0.001	1	0.039			2	0.164					1	0.008			1	0.015																			1	0.003	3	0.013
	Opheliidae	Ophelina cylindricaudata (Hansen, 1879)	26	0.00378457	30	0.00628272					2	0.002	7	0.006	5	0.004	8	0.008	1	0.001			1	0.002					1	0.001							4	0.005			2	0.002			1	0.002	2	0.003
	Orbiniidae	Scoloplos acutus (Verrill, 1873)	13	0.00189229	11	0.00230366	2	0.002	14	0.02	1	0.002	2	0.001	4	0.005	1	0.001	7	0.011	1	0.001	5	0.095	2	0.003			1	0.001	1	0.001	5	0.006	1	0.002	1	0.002	24	0.027	4	0.004	5	0.008			3	0.004
	Paraonidae	Aricidea suecica Eliason, 1920			1	0.000209424	2	0.001	7	0.003	2	0.001	6	0.004	7	0.004	4	0.002	1	0.0005			4	0.002															6	0.002	3	0.002	4	0.002	2	0.002	2	0.002
		Aricidea hartmanae (Strelzov, 1968)																																									1	0.001
		Levinsenia gracilis (Tauber, 1879)	2	0.000291121							6	0.003	17	0.009	9	0.003	5	0.003	2	0.001	2	0.002	6	0.004	2	0.001	2	0.001	7	0.004			1	0.0005	1	0.0005	7	0.003	1	0.0005	36	0.022	27	0.02	18	0.016	10	0.006
	Maldanidae	Maldane arctica Detinova, 1985	1	0.00014556
		Maldane sarsi Malmgren, 1865	6	0.000873362	1	0.000209424					1	0.01	4	0.079	1	0.009	13	0.204	1	0.095	1	0.065	2	0.051					1	0.006	2	0.213			1	0.244	11	0.275	2	0.002	7	0.127	4	0.083	6	0.425	4	0.088
		Clymenura polaris (Théel, 1879)	13	0.00189229	18	0.00376963			1	0.001			1	0.0005					2	0.007			5	0.03													1	0.003	2	0.015	1	0.001	2	0.004	6	0.028	1	0.006
		Nicomache lumbricalis (Fabricius, 1780)			1	0.000209424																									1	0.002					3	0.024	2	0.008	1	0.013
		Praxillella praetermissa (Malmgren, 1865)															1	0.019																					1	0.001			1	0.0005
		Petaloproctus tenuis (Théel, 1879)	1	0.00014556																																	1	0.001
	Capitellidae	Capitella capitata (Fabricius, 1780)	19	0.00276565	2	0.000418848	4	0.002	14	0.039			1	0.001	1	0.002	2	0.003																	3	0.006							1	0.005
		Heteromastus filiformis (Claparède, 1864)					1	0.002																			1	0.002									1	0.004					2	0.001	1	0.001
		Notomastus latericeus Sars, 1851																			2	0.022	2	0.009																	2	0.004					1	0.005
	Oweniidae	Myriochele heeri Malmgren, 1867	29	0.00422125	87	0.0182199					8	0.312	2	0.069			1	0.046	42	0.686	36	0.706	17	0.29	2	0.031	1	0.018	2	0.046	11	0.202	10	0.089			7	0.197	5	0.073	16	0.125	59	0.768	45	0.642	58	0.735
		Owenia polaris Koh, Bhaud & Jirkov, 2003	5	0.000727802	20	0.00418848			1	0.0005			1	0.011	2	0.027	6	0.089	2	0.027	7	0.05	5	0.082													2	0.007	33	0.22			2	0.002	2	0.017	1	0.01
	Sternaspidae	Sternaspis scutata Ranzani, 1817	1	0.00014556									3	0.011	1	0.002			1	0.529	1	0.312	18	0.871	1	0.043			4	0.49
	Pectinariidae	Cistenides hyperborea Malmgren, 1866	37	0.00538574	37	0.00774869	6	0.489	5	0.275	1	0.017					1	0.023					1	0.013							5	0.305	8	0.509	5	0.062			3	0.085	1	0.019
	Ampharetidae	Amphicteis ninonae Jirkov, 1985	1	0.00014556																																	1	0.061
		Glyphanostomum pallescens (Théel, 1879)	25	0.00363901	5	0.00104712															1	0.007
		Ampharete agg. lindstroemii	34	0.00494905	8	0.00167539			1	0.0005			5	0.023					1	0.001					1	0.002	2	0.034	2	0.002			3	0.005					1	0.002	5	0.012	2	0.018
		Ampharete acutifrons (Grube, 1860)	1	0.00014556
		Ampharete borealis (M. Sars, 1856)	2	0.000291121	1	0.000209424
		Ampharete finmarchica (M. Sars, 1865)	1	0.00014556	3	0.000628272													1	0.004
		Ampharete cf. sibirica			1	0.000209424
		Anobothrus gracilis (Malmgren, 1866)			4	0.000837696													1	0.024	3	0.274																	1	0.001			2	0.151			1	0.013
		Lysippe labiata Malmgren, 1866			4	0.000837696													2	0.007	5	0.077	4	0.05																			2	0.03	3	0.033	2	0.023
		Melinna elisabethae McIntosh, 1914			1	0.000209424																																									1	0.001
	Terebellidae	Thelepus cincinnatus (Fabricius, 1780)			3	0.000628272
		Terebellides aff. stroemii	59	0.00858806	68	0.0142408			1	0.019	1	0.009			4	0.049			6	0.183	4	0.076	4	0.027			1	0.001	1	0.005			2	0.027	1	0.019			5	0.075	1	0.015	2	0.044	3	0.033
		Polycirrus medusa Grube, 1850	4	0.000582242
		Lanassa nordenskjoldi Malmgren, 1866	1	0.00014556
		Laphania boecki Malmgren, 1866																	1	0.008																									1	0.009
		Leaena abranchiata (M. Sars, 1865)	4	0.000582242	1	0.000209424	2	0.007			3	0.006													1	0.003																	1	0.129
		Neoamphitrite affinis (Malmgren, 1866)			1	0.000209424
		Nicolea zostericola Örsted, 1844	1	0.00014556	1	0.000209424
		Proclea graffi (Langerhans, 1884)	6	0.000873362	13	0.00272251													1	0.007			2	0.002							2	0.041							6	0.024			2	0.016	1	0.003
	Sabellidae	Branchiomma arcticum (Ditlevsen, 1937)			1	0.000209424							1	0.005							1	0.226
		Euchone analis (Kröyer, 1856)			2	0.000418848
		Euchone papillosa (Sars, 1851)	12	0.00174672	1	0.000209424
		Chone duneri Malmgren, 1867	2	0.000291121	6	0.00125654													3	0.004
	Spirorbidae	Bushiella kofiadii Rzhavsky, 1988	1	0.00014556
		Bushiella similis (Bush, 1905)																																							1	0.003
		Circeis spirillum (Linnaeus, 1758)	3	0.000436681
	Siboglinidae	Oligobrachia haakonmosbiensis Smirnov, 2000	17	0.00247453	19	0.00397906	5	0.015	102	1.411	14	0.152							102	3.27	67	2.495	25	0.993							4	0.108	10	0.342	9	0.265			36	0.981			92	3.32	78	4.49	14	0.405
Hirudinea	Piscicolidae	Oceanobdella alba (Epshtein & S. Y. Utevsky, 1996)	6	0.000873362	9	0.00188482																					2	0.01
Sipuncula	Glolfingiidae	Golfingia margaritacea (Sars, 1851)											1	0.223					3	3.325	3	2.308	10	34.506																							2	1.311
		Nephasoma diaphanes (Gerould, 1913)	6	0.000873362	4	0.000837696											1	0.001																									1	0.002	1	0.001
	Phascolionidae	Phascolion strombus (Montagu, 1804)	134	0.0195051	17	0.00356021			4	0.041	1	0.001	1	0.005									1	0.003													5	0.102			4	0.196			2	0.099
Nemertea	Anopla	Cerebratulus sp.																																							1	0.002	2	0.015
		Lineidae gen.sp.	19	0.00276565	7	0.00146597					1	0.006	2	0.003	2	0.002	2	0.003	1	0.004							1	0.054			1	0.007	1	0.001			2	0.002			1	0.002	1	0.031
		Tubulanidae gen.sp.			3	0.000628272													2	0.03					1	0.08															1	0.032
	Enopla	Enopla gen.sp.	2	0.000291121	9	0.00188482			5	0.004							1	0.027			1	0.007	1	0.008																					1	0.006
		Nemertea gen.sp.	2	0.000291121
Mollusca	Caudofoveata	Chaetoderma sp.															1	0.011			1	0.059					2	0.031									1	0.052			1	0.091					2	0.152
	Gastropoda	Margarites groenlandicus (Gmelin, 1791)	6	0.000873362	8	0.00167539					2	0.001																																	2	0.372
		Margarites olivaceus (Brown, 1827)	5	0.000727802
		Solariella obscura (Couthouy, 1838)	62	0.00902475	6	0.00125654			3	0.015	1	0.002	1	0.001							1	0.004															1	0.008	1	0.02
		Limneria undata (T. Brown, 1839)	1	0.00014556	1	0.000209424
		Boreocingula castanea (Møller, 1842)			11	0.00230366													2	0.003			1	0.004																							2	0.006
		Boreocingula cf. martyni			9	0.00188482
		Frigidalvania sp.	828	0.120524	113	0.0236649	6	0.09	53	0.478	65	1.279																							234	2.458	1	0.002
		Admete viridula (Fabricius, 1780)	22	0.00320233	25	0.0052356					3	0.04									1	0.016															1	0.174
		Obesotoma gigantea (Mörch, 1869)			4	0.000837696																							1	0.18
		Oenopota impressa (Mörch, 1869)			3	0.000628272																																			1	0.055
		Propebela arctica (A. Adams, 1855)																					1	0.008
		Propebela bergensis (Friele, 1886)	13	0.00189229	6	0.00125654													4	0.048
		Propebela sp.																																									1	0.004	2	0.039
		Curtitoma trevelliana (Turton, 1834)	1	0.00014556	10	0.00209424																																			1	0.004
		Colus sabini (Gray, 1824)	6	0.000873362	2	0.000418848
		Buccinum cyaneum Bruguière, 1792	1	0.00014556
		Buccinum glaciale Linnaeus, 1761	1	0.00014556
		Euspira pallida (Broderip & Sowerby, 1829)	3	0.000436681	1	0.000209424																					1	0.328					1	0.916
		Cryptonatica affinis (Gmelin, 1791)			1	0.000209424
		Retusa obtusa (Montagu, 1803)	5	0.000727802	1	0.000209424					2	0.001																											1	0.002
		Cylichna alba (Brown, 1827)	2	0.000291121	8	0.00167539
		Cylichna occulta (Mighels & Adams, 1842)	51	0.00742358	10	0.00209424	4	0.02	5	0.037	2	0.002													1	0.096	2	0.041					2	0.005	1	0.002	3	0.031	1	0.002
		Cylichna scalpta Reeve, 1855	17	0.00247453	6	0.00125654	3	0.008	3	0.002			1	0.002			2	0.032															2	0.034
		Diaphana hiemalis (Couthouy, 1839)	16	0.00232897
		Laona finmarchica (M. Sars, 1859)	110	0.0160116							1	0.065
		Philine lima (Brown, 1827)			17	0.00356021																											1	0.013													2	0.039
		Cepalaspidea gen.sp.													1	0.001
	Bivalvia	Portlandia arctica (Gray, 1824)	176	0.0256186	7	0.00146597			1	0.045	3	0.017	18	0.626	30	0.854	23	0.74							12	4.328	14	5.723	10	3.973					1	0.195	2	0.002
		Yoldiella frigida (Torell, 1859)	10	0.0014556	30	0.00628272																	1	0.009															2	0.003	1	0.004			1	0.004
		Yoldiella solidula Warén, 1989	537	0.0781659	520	0.108901	5	0.001	5	0.001	49	0.046	62	0.07	29	0.047	31	0.054	23	0.059	24	0.057	13	0.039	15	0.031	7	0.017	6	0.019	28	0.052	9	0.02			52	0.106	12	0.022	46	0.107	44	0.098	18	0.039	19	0.059
		Yoldiella lenticula (Møller, 1842)	506	0.0736536	53	0.0110995	1	0.013	3	0.008	16	0.13	15	0.19	23	0.31	8	0.12			1	0.004			1	0.003			1	0.014	11	0.122	9	0.092	4	0.048	14	0.07	4	0.011	3	0.026	1	0.008	2	0.014	2	0.02
		Nuculana pernula (O. F. Müller, 1779)	37	0.00538574	44	0.00921466	1	0.352	3	0.007	2	0.713	1	1.396					1	0.002	1	0.005	1	0.447							2	0.64	1	0.114	2	0.085			2	0.682	2	1.437	2	0.472
		Ennucula tenuis (Montagu, 1808)	31	0.00451237	30	0.00628272			3	0.007	13	0.039	10	0.005	3	0.001	8	0.003	1	0.031	3	0.003			5	0.014	5	0.006			1	0.001	1	0.004	1	0.01	5	0.016	4	0.013	7	0.088	5	0.007	9	0.026	7	0.03
		Bathyarca glacialis (Gray, 1824)	3	0.000436681
		Similipecten greenlandicus (G. B. Sowerby II, 1842)	47	0.00684134	7	0.00146597			1	0.001
		Axinopsida orbiculata (G. O. Sars, 1878)	2	0.000291121	29	0.0060733			29	0.029	6	0.029							3	0.005			31	0.062									3	0.006	1	0.002	8	0.049	4	0.009			8	0.014	4	0.007	9	0.016
		Mendicula ferruginosa (Forbes, 1844)	3	0.000436681	1	0.000209424																															3	0.004					2	0.005			1	0.003
		Thyasira gouldi (Philippi, 1845)	26	0.00378457	6	0.00125654	1	0.001					3	0.032	6	0.026	6	0.015	7	0.047	3	0.025	5	0.03	3	0.033	2	0.015			1	0.01	1	0.004	1	0.009	4	0.043			6	0.044			2	0.021	3	0.033
		Thracia myopsis Møller, 1842	2	0.000291121	7	0.00146597															1	0.003															1	0.003					2	0.021	1	0.009
		Dacrydium vitreum (Møller, 1842)	7	0.00101892	13	0.00272251
		Musculus discors (Linnaeus, 1767)	2	0.000291121
		Hiatella arctica (Linnaeus, 1767)	1	0.00014556	1	0.000209424
		Astarte crenata (Gray, 1824)			1	0.000209424
		Macoma calcarea (Gmelin, 1791)	12	0.00174672	12	0.00251309	5	0.005	25	0.055	3	0.01							2	0.004			13	0.074	1	0.047	1	0.144	1	1.284	6	0.107	1	0.033			2	0.009	1	0.244	2	0.569	2	0.006
		Macoma moesta (Deshayes, 1855)	3	0.000436681
		Periploma aleuticum (A. Krause, 1885)			11	0.00230366													1	0.025																	1	0.549
		Cuspidaria arctica (Sars, 1859)	1	0.00014556
		Cuspidaria glacialis (Sars G. O., 1878)	55	0.00800582	18	0.00376963											1	0.007																			2	0.072			1	0.013
		Bivalvia gen.sp.											1	0.001	1	0.001	1	0.001																							1	0.001
	Scaphopoda	Siphonodentalium lobatum (G. B. Sowerby II, 1860)	1	0.00014556
Priapulida	Priapulidae	Priapulus caudatus Lamarck, 1816																																					1	0.004
Crustacea	Tanaidacea	Akanthophoreus gracilis (Krøyer, 1842)	13	0.00189229			1	0.0001	32	0.001	8	0.0001	9	0.0001	8	0.0001	16	0.0001	1	0.0005											1	0.001
		Cryptocopoides arctica (Hansen, 1887)	9	0.00131004																																			1	0.0005			1	0.0005
		Pseudotanais affinis Hansen, 1887			1	0.000209424
	Cumacea	Diastylis goodsiri (Bell, 1855)	25	0.00363901	13	0.00272251									2	0.046							1	0.308													1	0.215							1	0.084
		Diastylis lepechini Zimmer, 1926																			1	0.004
		Diastylis oxyrhyncha Zimmer, 1926	1	0.00014556
		Diastylis spinulosa Heller, 1875	1	0.00014556	16	0.00335079
		Leptostylis gorbunovi Zimmer, 1946	1	0.00014556																	1	0.001																									1	0.001
		Leptostylis villosa Sars, 1869			1	0.000209424
		Leucon acutirostris G.O. Sars, 1865	2	0.000291121	2	0.000418848	8	0.0001																			1	0.0005																	3	0.002	1	0.0005
		Leucon nasica (Krøyer, 1841)	2	0.000291121
		Leucon nathorsti Ohlin, 1901			12	0.00251309			3	0.0001			4	0.0001			1	0.0001																							1	0.005			1	0.002
		Eudorella emarginata (Krøyer, 1846)	21	0.00305677	29	0.0060733	5	0.0001	7	0.011			3	0.003	8	0.009	1	0.0001	4	0.012	2	0.01	6	0.021	2	0.01			1	0.004			1	0.006	1	0.007	6	0.038	3	0.019	2	0.013	4	0.009	2	0.003	3	0.023
		Campylaspis rubicunda (Liljeborg, 1855)	1	0.00014556
		Cumacea gen.sp.									1	0.0001
	Isopoda	Caecognathia elongata (Krøyer, 1849)	6	0.000873362	2	0.000418848																																	1	0.002
		Saduria sabini (Krøyer, 1849)	8	0.00116448	1	0.000209424			1	0.086							1	0.026													1	3.165
		Synidotea bicuspida (Owen, 1839)	1	0.00014556																																											1	0.002
		Calathura brachiata (Stimpson, 1853)	1	0.00014556
		Munna fabricii Krøyer, 1846			4	0.000837696							1	0.001
		Desmosoma lineare G.O. Sars, 1864	1	0.00014556	1	0.000209424
		Eurycope cornuta G.O. Sars, 1864			1	0.000209424
		Munnopsis typica M. Sars, 1861	46	0.00669578	88	0.0184293																					1	0.073
	Mysida	Boreomysis nobilis G.O. Sars, 1879	1	0.00014556
		Erythrops erythrophthalmus (Goës, 1864)	5	0.000727802	11	0.00230366
	Amphipoda	Hyperia galba (Montagu, 1815)	1	0.00014556
		Aeginina longicornis (Krøyer, 1843)	1	0.00014556																																			1	0.079
		Caprella linearis (Linnaeus, 1767)			9	0.00188482															1	0.014
		Anonyx nugax (Phipps, 1774)	16	0.00232897	7	0.00146597											1	0.006
		Centromedon sp.																																					1	0.01
		Hippomedon propinqvus Sars, 1890	2	0.000291121																			1	0.039
		Lepidepecreum umbo (Goës, 1866)	29	0.00422125	1	0.000209424					1	0.004
		Onisimus barentsi (Stebbing, 1894)			1	0.000209424															1	0.005																							1	0.025
		Onisimus caricus Hansen, 1887	1	0.00014556																	1	0.487
		Socarnes bidenticulatus (Bate, 1858)	3	0.000436681	2	0.000418848
		Tryphosella schneideri (Stephensen, 1921)	2	0.000291121																							1	0.004
		Orchomenella minuta (Krøyer, 1846)			1	0.000209424
		Lysianassidae gen. sp.					1	0.0001
		Stegocephalus inflatus Krøyer, 1842	1	0.00014556	2	0.000418848
		Harpiniopsis similis Stephensen, 1925	1	0.00014556
		Ampelisca birulai Brüggen, 1909			2	0.000418848													2	0.035			4	0.106													1	0.032
		Ampelisca eschrichtii Krøyer, 1842	17	0.00247453	7	0.00146597													4	0.029	1	0.039																	1	0.088	1	0.004	18	1.735	2	0.057	2	0.093
		Byblis gaimardii (Kröyer, 1846)	10	0.0014556	6	0.00125654															1	0.013	1	0.023									4	0.249			1	0.024			1	0.003			2	0.133	1	0.013
		Haploops laevis Hoek, 1882	12	0.00174672	14	0.00293194									3	0.021	2	0.009	4	0.139	1	0.043									1	0.011	1	0.002							10	0.038	4	0.191	7	0.358
		Haploops tubicola Liljeborg, 1856	26	0.00378457	12	0.00251309							2	0.0001			3	0.023			1	0.018							1	0.012							2	0.011
		Acanthostepheia malmgreni (Goës, 1866)	12	0.00174672	4	0.000837696
		Bathymedon nanseni Gurjanova, 1946	2	0.000291121	2	0.000418848
		Paraoediceros lynceus (Sars, 1858)	124	0.0180495	44	0.00921466			8	0.025	3	0.026																							1	0.008
		Aceroides latipes (Sars, 1883)					40	0.003	16	0.007											1	0.016																			1	0.002
		Arrhis phyllonyx (Sars, 1858)	17	0.00247453	39	0.00816754																					1	0.026																			1	0.027
		Monoculodes latimanus (Goës, 1866)			6	0.00125654
		Rostroculodes hanseni (Stebbing, 1894)			42	0.00879581																																					1	0.031
		Rostroculodes longirostris (Goës, 1866)	5	0.000727802
		Syrrhoe crenulata Goës, 1866																																											1	0.001
		Acanthonotozoma inflatum (Krøyer, 1842)			1	0.000209424
		Paramphithoe cuspidata (Lepechin, 1780)	2	0.000291121
		Rozinante fragilis (Goës, 1866)	35	0.00509461	7	0.00146597
		Halirages nilssoni Ohlin, 1895	2	0.000291121	1	0.000209424
		Melphidippa goesi Stebbing, 1899			1	0.000209424
		Pleustes tuberculatus Bate, 1858	5	0.000727802	9	0.00188482
		Stenopleustes eldingii Gurjanova, 1930	3	0.000436681	4	0.000837696
		Pleusymtes pulchellus (Sars, 1876)	25	0.00363901	34	0.00712042	2	0.0001	5	0.014	3	0.002																			1	0.003	2	0.007									2	0.003	1	0.002
		Atylus carinatus (Fabricius, 1793)	2	0.000291121
		Nototropis smitti (Goës, 1866)			7	0.00146597
		Arctolembos arcticus (Hansen, 1887)											1	0.368			1	0.408													1	0.03
		Ischyrocerus brusilovi Gurjanova, 1933			3	0.000628272
		Ischyrocerus latipes Krøyer, 1842	4	0.000582242	5	0.00104712															1	0.0005	3	0.005	3	0.006							2	0.002	1	0.001
		Ischyrocerus megalops Sars, 1894	1	0.00014556
		Ischyrocerus sp.	1	0.00014556
		Gammaropsis melanops G.O. Sars, 1883			1	0.000209424
		Photis reinhardi Krøyer, 1842	6	0.000873362	1	0.000209424																																									1	0.001
		Photis tenuicornis Sars, 1882	3	0.000436681																																							1	0.001
		Protomedeia grandimana Brüggen, 1906																	4	0.002																									1	0.001	1	<0,001
		Protomedeia fasciata Sars, 1882	2	0.000291121
		Unciola leucopis (Krøyer, 1845)	1	0.00014556																											1	0.007
		Dyopedos knipowitschi (Gurjanova, 1933)			1	0.000209424															2	0.002																							1	0.0005
		Paradulichia typica Boeck, 1870	4	0.000582242	7	0.00146597							2	0.001			1	0.0001							8	0.013							1	0.004
		Amphipoda gen.sp.									1	0.0001	7	0.001			2	0.0001
	Decapoda	Eualus gaimardii (H. Milne Edwards, 1837)	4	0.000582242	6	0.00125654
		Sabinea septemcarinata (Sabine, 1824)	6	0.000873362	27	0.00565445
Pantopoda	Nymphonidae	Boreonymphon robustum (Bell, 1855)	3	0.000436681	4	0.000837696
		Nymphon hirtipes Bell, 1853	7	0.00101892	27	0.00565445															1	0.048
		Nymphon longitarse Krøyer, 1844	1	0.00014556
		Nymphon sluiteri Hoek, 1901			2	0.000418848
		Nymphon stroemi Krøyer, 1844			2	0.000418848
Bryozoa	Ctenostomatida	Alcyonidium disciforme Smitt, 1872	8	0.00116448
		Alcyonidium gelatinosum (Hudson) J.V.Lamouroux	6	0.000873362																																	1	0.002			1	0.002
	Cyclostomatida	Crisia eburneodenticulata Smitt ms in Busk, 1875	6	0.000873362	1	0.000209424							1	0.001
		Defrancia lucernaria M. Sars, 1851	2	0.000291121
		Tubulipora fruticosa Kluge, 1946	2	0.000291121
		Lichenopora sp.	1	0.00014556
	Cheilostomatida	Carbasea carbasea (Ellis & Solander, 1786)	3	0.000436681
		Eucratea loricata (Linnaeus, 1758)	8	0.00116448																																									1	0.002
		Tricellaria gracilis (Van Beneden, 1848)	1	0.00014556
		Dendrobeania fruticosa (Packard, 1863)	3	0.000436681
		Kinetoskias smitti Danielssen, 1868	4	0.000582242
		Porella fragilis Levinsen, 1914	1	0.00014556													1	0.008
		Cheilopora sincera (Smitt, 1867)	8	0.00116448													4	0.094
		Parasmittina jeffreysi (Norman, 1876)	2	0.000291121
		Pseudoflustra birulai Kluge, 1929	2	0.000291121
		Pseudoflustra solida (Stimpson, 1854)	1	0.00014556
		Ramphostomella bilaminata (Hincks, 1877)	2	0.000291121
		Rhamphostomella plicata (Smitt, 1868)											2	0.012
Echinodermata	Holothuroidea	Eupyrgus scaber Lütken, 1857	53	0.0077147	24	0.00502618													1	0.041	1	0.029	1	0.029									1	0.032									5	0.12
		Myriotrochus rinсki Steenstrup, 1851	21	0.00305677	6	0.00125654																	1	1.242			1	0.032									1	0.002			1	0.051
	Echinoidea	Strongylocentrotus pallidus (Sars G.O., 1872)	2	0.000291121	17	0.00356021
	Asteroidea	Ctenodiscus crispatus (Retzius, 1805)	27	0.00393013	24	0.00502618	1	0.017			1	0.011									1	0.312			1	0.091	1	0.23	2	7.444											2	0.003	2	0.142	1	0.008
		Hymenaster pellucidus Thomson, 1873	7	0.00101892
		Lophaster furcifer (Düben & Koren, 1846)			1	0.000209424
		Urasterias lincki (Müller & Troschel, 1842)	34	0.00494905	17	0.00356021
	Ophiuroidea	Ophiocten sericeum (Forbes, 1852)	2564	0.373217	2175	0.455497	26	0.047	27	0.024	5	0.002	1	0.002	6	0.005	8	0.037	6	0.252	2	0.009	6	0.062	1	0.006					6	0.014	9	0.079	3	0.009	4	0.066	1	0.009			15	0.038	5	0.015	4	0.474
		Ophiura robusta (Ayres, 1852)			1	0.000209424
Chordata	Ascidiacea	Didemnum albidum (Verrill, 1871)	1	0.00014556	1	0.000209424
		Ascidia sp.	1	0.00014556
		Rhizomolgula globularis (Pallas, 1776)																																									2	0.04	1	0.011
		Synoicum pulmonaria (Ellis & Solander, 1786)	1	0.00014556
	Pisces	Lycodes sp.	2	0.000291121	1	0.000209424
		Triglops murrayi Günther, 1888	1	0.00014556	2	0.000418848
		A - abundance, ind. m-2
		B - biomass, g ww m-2
